# Supplementary material
Source: Springer Nature journal article supplement (https://www.springermedizin.de/resource/supplementary/12967_2014_2113_MOESM14_ESM.pdf/9575066)
Supplement: MOESM14 [file 9575066]

A

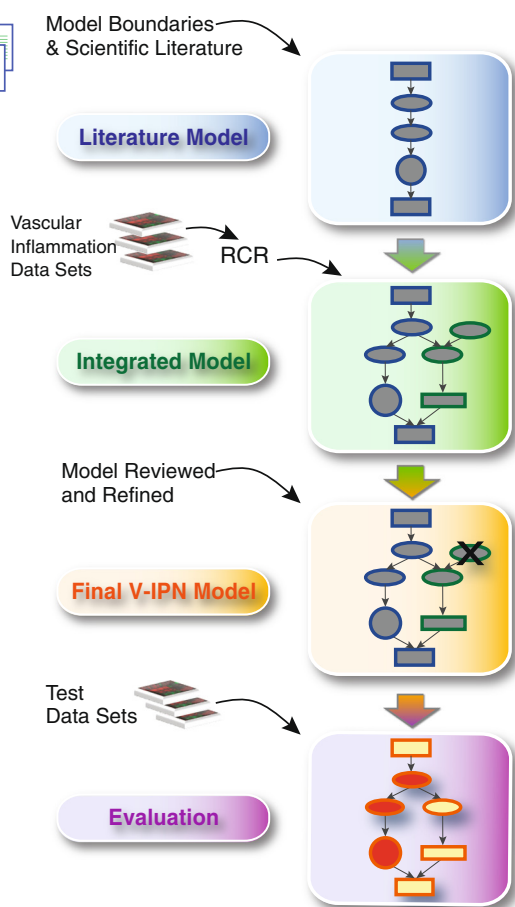

B

Knowledge in BEL format

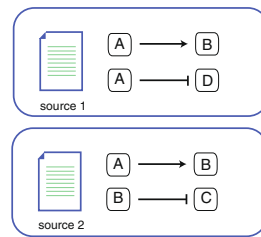

Knowledge assembled into a model

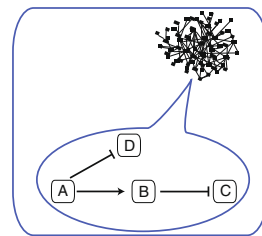

C

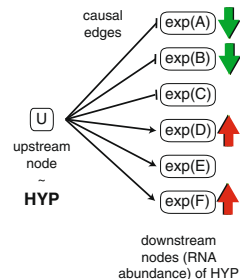

| Gene | Fold Change | P-value | State Change |
|------|-------------|---------|--------------|
| A    | -2.1        | 0.003   | decrease     |
| B    | -1.5        | 0.007   | decrease     |
| C    | 1.1         | 0.04    |              |
| D    | 2.3         | 0.01    | increase     |
| E    | 1.5         | 0.4     |              |
| F    | 8.1         | 0.002   | increase     |

Significance criteria:  
abs(fold change) ≥ 1.3  
p-value ≤ 0.05

↑ significant measured increase mapped to the node

↓ significant measured decrease mapped to the node
